1 **Epidemiological and Genomic Analysis of SARS-CoV-2 in Ten Patients from a Mid-sized**  
2 **City outside of Hubei, China**

3 Jinkun Chen<sup>1§</sup>, Evann E. Hilt<sup>2§</sup>, Huan Wu<sup>3</sup>, Zhuojing Jiang<sup>1</sup>, QinChao Zhang<sup>1</sup>, JiLing Wang<sup>1</sup>,  
4 Yifang Wang<sup>3</sup>, Fan Li<sup>4</sup>, Ziqin Li<sup>5</sup>, Jialiang Tang<sup>1\*</sup>, Shangxin Yang<sup>2,5\*</sup>

5  
6 <sup>1</sup>Shaoxing Center for Disease Control and Prevention, Shaoxing, Zhejiang, China; <sup>2</sup>Department  
7 of Pathology and Laboratory Medicine, University of California Los Angeles, Los Angeles, CA,  
8 USA; <sup>3</sup>IngeniGen XunMinKang Biotechnology Inc., Shaoxing, Zhejiang, China; <sup>4</sup>Three Coin  
9 Analytics, Inc. Pleasanton, CA, USA; <sup>5</sup>Zhejiang-California International Nanosystems Institute,  
10 Zhejiang University, Hangzhou, Zhejiang, China

11  
12 §Authors contributed equally.

13 \*Corresponding authors: Jialiang Tang: [992488904@qq.com](mailto:992488904@qq.com); Shangxin Yang, PhD, D(ABMM):  
14 [shangxinyang@mednet.ucla.edu](mailto:shangxinyang@mednet.ucla.edu)

15  
16 RUNNING TITLE: Genomic Analysis of SARS-CoV-2 by Metagenomic Sequencing

17  
18 KEYWORDS: SARS-CoV-2, Metagenomic Sequencing, Mutation Rate, S Genotype, COVID-  
19 19, 2019-nCoV

20

21 ABSTRACT

22 A novel coronavirus known as severe acute respiratory syndrome coronavirus 2 (SARS-  
23 CoV-2) is the cause of the ongoing COVID-19 pandemic. In this study, we performed a  
24 comprehensive epidemiological and genomic analysis of SARS-CoV-2 genomes from ten  
25 patients in Shaoxing, a mid-sized city outside of the epicenter Hubei province, China, during the  
26 early stage of the outbreak (late January to early February, 2020). We obtained viral genomes  
27 with > 99% coverage and a mean depth of 296X demonstrating that viral genomic analysis is  
28 feasible via metagenomics sequencing directly on nasopharyngeal samples with SARS-CoV-2  
29 Real-time PCR  $C_t$  values less than 28. We found that a cluster of 4 patients with travel history to  
30 Hubei shared the exact same virus with patients from Wuhan, Taiwan, Belgium and Australia,  
31 highlighting how quickly this virus spread to the globe. The virus from another cluster of two  
32 family members living together without travel history but with a sick contact of a confirmed case  
33 from another city outside of Hubei accumulated significantly more mutations (9 SNPs vs average  
34 4 SNPs), suggesting a complex and dynamic nature of this outbreak. We also found 70% patients  
35 in this study had the S genotype, consistent with an early study showing a higher prevalence of S  
36 genotype out of Hubei than that inside Hubei. We calculated an average mutation rate of  
37  $1.37 \times 10^{-3}$  nucleotide substitution per site per year, which is similar to that of other coronaviruses.  
38 Our findings add to the growing knowledge of the epidemiological and genomic characteristics  
39 of SARS-CoV-2 that are important for guiding outbreak containment and vaccine development.  
40 The moderate mutation rate of this virus also lends hope that development of an effective, long-  
41 lasting vaccine may be possible.

42

43

44

## 45 INTRODUCTION

46           Coronaviruses (CoVs) are a large family of single-stranded RNA viruses that can be  
47 isolated from a variety of animals including camels, rats, birds and bats (1). These coronaviruses  
48 can cause a range of disease states in animals including respiratory, enteric, hepatic and  
49 neurological disease (2). Before late 2019, there were six known CoVs capable of infecting  
50 humans (Hu-CoVs). The first four Hu-CoVs that cause mild disease are HKU1, NL63, OC43  
51 and 229E and are known to circulate in the human population (3). The other two Hu-CoVs,  
52 known as severe acute respiratory syndrome-CoV (SARS-CoV) and middle east respiratory  
53 syndrome-CoV (MERS-CoV), caused two previous epidemics in 2003 (4) and 2012 (5)  
54 respectively. Both SARS-CoV and MERS-CoV were the results of recent spillover events from  
55 animals. These two epidemics highlighted how easy it is for recombination events in CoVs to  
56 occur and cause outbreaks in humans.

57           In December 2019, another spillover event occurred and a seventh Hu-CoV appeared  
58 known as severe acute respiratory syndrome coronavirus 2 (SARS-CoV-2), previously named  
59 2019-nCoV (6). SARS-CoV-2 has been spreading rapidly across the world since it was first  
60 reported in Wuhan, Hubei province, China (6, 7). The advances and accessibility of sequencing  
61 technologies have allowed researchers all over the world to quickly sequence the genome of  
62 SARS-CoV-2 (8, 9). Zhou *et al.* 2020 showed that SARS-CoV-2 shared 79.6% sequence identity  
63 to SARS-CoV and 96% sequence identity to a bat CoV further supporting the theory of another  
64 spillover event (8).

65           Further analysis of SARS-CoV-2 genomes proposed that there are two major genotypes,  
66 known as L type and S type, based on almost complete linkage between two SNPs (10). Tang *et*

67 *al.* 2020 proposed that the L type may be more aggressive in replication rates and spreads more  
68 quickly, and that human intervention efforts in China may have put selective pressure on L  
69 genotypes of SARS-CoV-2 (10). The authors showed that the L type was dominant (96.3%) in  
70 Wuhan but significantly less prevalent (61.6%) outside of Wuhan, whereas the S type increased  
71 from only 3.7% in Wuhan to 38.4% outside of Wuhan. The same phenomenon is also observed  
72 temporally when comparing the S:L type distribution in the early phase of the outbreak (before  
73 January 7, 2020) versus after January 7, 2020. In order to test this hypothesis, more work needs  
74 to be done that combines not only epidemiologic data but also in-depth genomic analysis of these  
75 patient samples.

76 Here we present a comprehensive epidemiological and genomic analysis of SARS-CoV-2  
77 genomes from 10 patients in Shaoxing, a mid-sized city about 500 miles away from Wuhan. This  
78 work is one of the first to estimate the mutation rates of SARS-CoV-2 which is a critical  
79 component to understanding the sequence evolution of a virus, and an essential step to  
80 developing future vaccines and therapies.

81

## 82 MATERIALS AND METHODS

### 83 Study design and Ethics

84 Ten remnant nasopharyngeal swab samples collected between 1/27/2020 and 2/7/2020,  
85 and tested positive by a SARS-CoV-2 real-time PCR assay with cycle threshold ( $C_t$ ) values of  
86 less than 28, were included in this study. The samples were de-identified except the associated  
87 epidemiological data were retained. The institutional review boards (IRB) approval was waived  
88 for this project by Shaoxing Center for Disease Control and Prevention.

### 89 SARS-CoV-2 PCR & RNA Sequencing

90 Total nucleic acid was extracted from the nasopharyngeal swabs using the Total Nucleic  
91 Acid Extraction Kit (IngeniGen XMK Biotechnologies, Inc. Zhejiang, China). Real-time PCR  
92 was performed by using the IngeniGen XMKbio 2019-nCoV (SARS-CoV-2) RNA Detection kit,  
93 which targets the highly specific sequences in the *ORF1ab* and *N* genes of the virus, on the ABI  
94 7500 system (ThermoFisher Scientific, Inc. MA, USA). The RNA libraries were constructed  
95 using the IngeniGen XMKbio RNA-seq Library Prep Kit (IngeniGen XMK Biotechnologies, Inc.  
96 Zhejiang, China). Briefly, DNase was used to remove residual human DNA and the RNA was  
97 fragmented, followed by double-strand cDNA synthesis, end-repair, dA-tailing and adapter  
98 ligation. Sequencing was performed by using the 2X75bp protocol on the Nextseq 550 system  
99 (Illumina, Inc. CA, USA).

#### 100 Data Analysis

101 Quality control and trimming of paired-end reads was performed using custom Python  
102 scripts as follows: 1) trim 3' adapters; 2) trim reads at ambiguous bases; 3) filter reads shorter  
103 than 40bp; 4) filter reads with average quality score < 20. Host-derived reads were removed by  
104 alignment against the GRCh38.p13 genome reference using bowtie2 (v2.3.4.3) with default  
105 parameters. The retained reads were then mapped to 163 published SARS-CoV-2 reference  
106 genomes obtained from GISAID (<https://www.gisaid.org/CoV2020/>, accessed March 2, 2020) by  
107 bowtie2 (v2.3.4.3) with default parameters. snippy (v4.5.0) was used for variant calling and core  
108 SNP alignment against the Wuhan-Hu-1 reference, FastTree (v2.1.3) was used for tree  
109 construction using default parameters, and Figtree (v1.4.4) was used to visualize the resulting  
110 phylogenetic tree. Additional statistical analyses and visualizations were performed using custom  
111 Python scripts with the pandas (v0.25.0) and matplotlib (v3.1.1) modules. The S/L type was  
112 determined according to methods previously described (10). Briefly, C at position 8782 and T at

113 position 28144 was determined to be L type, and T at position 8782 and C at position 28144 was  
114 determined to be S type.

115

## 116 RESULTS

### 117 Epidemiology of Shaoxing Patients

118 All ten patients presented with symptoms consistent with COVID-19 in late January and  
119 early February of 2020. The majority of patients were male (60%) and the average age was 44  
120 (**Table 1**). The patients can be categorized into two epidemiologic groups with either a travel  
121 history to the Hubei province or contact with a confirmed case (**Table 1**). There was one case  
122 where we were unable to obtain a travel or social history (Shaoxing-8).

123

124 **Table 1. Epidemiologic Data of the 10 Shaoxing Patients**

| ID          | Sex | Age Range | History of Travel or Sick Contact                                                                                   | Date of Symptom Onset | Date of Sample Collection |
|-------------|-----|-----------|---------------------------------------------------------------------------------------------------------------------|-----------------------|---------------------------|
| Shaoxing-01 | F   | 30-39     | Family members traveled together to Hubei province<br>(1/15 – 1/24)                                                 | 1/24/20               | 1/27/20                   |
| Shaoxing-02 | M   | 70-79     |                                                                                                                     | 1/29/20               | 1/30/20                   |
| Shaoxing-03 | F   | 60-66     |                                                                                                                     | 1/28/20               | 1/30/20                   |
| Shaoxing-04 | M   | 50-59     |                                                                                                                     | 1/29/20               | 1/31/20                   |
| Shaoxing-05 | F   | 50-59     | Traveled to Hubei (1/16 – 1/23)                                                                                     | 1/29/20               | 1/31/20                   |
| Shaoxing-06 | M   | 39-39     | Resident of Wuhan;<br>Traveled to Shaoxing on 1/17                                                                  | 1/29/20               | 1/31/20                   |
| Shaoxing-07 | M   | <18       | Traveled to Hubei (1/11 – 1/24);<br>Two family members were confirmed cases                                         | 1/30/20               | 1/30/20                   |
| Shaoxing-08 | M   | 50-59     | Unknown                                                                                                             | 1/31/20               | 2/7/20                    |
| Shaoxing-09 | F   | 30-39     | Family members living together no travel history;<br>Contact with a confirmed case from Ningbo, Zhejiang<br>on 1/27 | 2/2/20                | 2/5/20                    |
| Shaoxing-10 | M   | 30-39     |                                                                                                                     | 2/5/20                | 2/6/20                    |

125

126 There are two apparent clusters in these ten patients. The first cluster involves four  
127 patients that are relatives who traveled together to the Hubei province in the late January. The  
128 first patient in this cluster had symptom onset on their last day in Hubei province while the other

129 three patients had symptom onset 4-5 days after their trip (**Table 1**). The second cluster involves  
130 two patients who are family members that live together and did not travel to the Hubei province.  
131 Patient Shaoxing-09 developed symptoms a few days before Shaoxing-10, and Shaoxing-09 had  
132 a sick contact with a confirmed case from Ningbo, a more populated city in the same province  
133 (Zhejiang) as Shaoxing (**Table 1**).

#### 134 Metagenomic Sequencing

135 The patients were confirmed to have SARS-CoV-2 infection by a commercial Real-time  
136 PCR assay. The average  $C_t$  values for the 10 patient samples were 23.17 for *ORF1ab* and 24.54  
137 for *N* (**Table 2**). Metagenomic sequencing was performed to recover the full viral genome. The  
138 total number of sequence reads for the samples ranged from 10.4 million to 27.5 million reads  
139 with an average of 17.1 million reads. A small percentage of these reads mapped to SARS-CoV-  
140 2 RNA (**Table 2**). The range of sequence reads that mapped to SARS-CoV-2 RNA was 2,413  
141 reads to 163,158 reads with an average of 49,066 reads. We observed a clear negative correlation  
142 between the  $C_t$  values of each gene (*ORF1ab* and *N*) and the log value of SARS-CoV-2 RNA  
143 reads (**S1 Fig**). However, the linearity is not significant ( $R^2=0.6628, 0.5595$  for *ORF1ab* and *N*,  
144 respectively), indicating that the number of RNA reads measured by metagenomics sequencing  
145 are only semi-quantitative and cannot be interpreted directly as viral loads.

146

147 **Table 2. Summary of Sequencing Results of 10 Shaoxing Patient Samples.**

| ID          | Ct Value (ORF1ab) | Ct Value (N) | Total Sequencing Reads (PE 75) | 2019-nCoV RNA (Raw Reads) | 2019-nCoV RNA (Log Value) | Genome Coverage (%) | Mean Depth (X) |
|-------------|-------------------|--------------|--------------------------------|---------------------------|---------------------------|---------------------|----------------|
| Shaoxing-01 | 21.57             | 23.62        | 17,158,277                     | 40,057                    | 4.60                      | 99.4                | 219            |
| Shaoxing-02 | 18.86             | 20.93        | 13,602,710                     | 149,682                   | 5.18                      | 99.9                | 929            |
| Shaoxing-03 | 20.09             | 22.25        | 24,769,343                     | 163,158                   | 5.21                      | 99.8                | 1024           |
| Shaoxing-04 | 24.02             | 24.68        | 21,509,477                     | 15,424                    | 4.19                      | 100.0               | 81             |

|             |       |       |            |         |      |       |      |
|-------------|-------|-------|------------|---------|------|-------|------|
| Shaoxing-05 | 21.81 | 23.81 | 14,043,326 | 99,521  | 5.00 | 99.9  | 591  |
| Shaoxing-06 | 25.88 | 27.08 | 18,909,299 | 3,535   | 3.55 | 99.9  | 18   |
| Shaoxing-07 | 23.11 | 23.87 | 10,480,051 | 5,063   | 3.70 | 99.8  | 26   |
| Shaoxing-08 | 23.34 | 24.53 | 11,506,909 | 2,413   | 3.38 | 99.9  | 12   |
| Shaoxing-09 | 26.81 | 27.85 | 27,517,291 | 8,897   | 3.95 | 99.9  | 47   |
| Shaoxing-10 | 26.24 | 26.8  | 11,071,595 | 2,911   | 3.46 | 99.7  | 15   |
| Min         | 18.86 | 20.93 | 10,480,051 | 2,413   | 3.38 | 99.4  | 12   |
| Max         | 26.81 | 27.85 | 27,517,291 | 163,158 | 5.21 | 100.0 | 1024 |
| Mean        | 23.17 | 24.54 | 17,056,828 | 49,066  | 4.22 | 99.8  | 296  |

148

149           With a large variation in the SARS-CoV-2 RNA mapped reads, we were still able to  
150 obtain excellent coverage and depth when each genome was mapped to the first SARS-CoV-2  
151 genome, Wuhan-Hu-1 (6) (**Fig 1A**). The coverage for all genomes was above 99% and the mean  
152 depth for the genomes ranged from 12X to 1024X (**Table 2, Fig 1B**). Genomes sequenced to a  
153 relatively low mean depth (12X to 47X) were still able to be genotyped successfully (see Results  
154 below) but our results suggest that SARS-CoV-2 read counts of at least 15,000 yield sufficiently  
155 high depth to characterize even low prevalence or rare mutations.

156

### 157 **Fig 1. Coverage and Depth**

158 **(A) Coverage and Depth Map.** The coverage and depth at each base are depicted by the dark  
159 red shading along the circle. **(B) Depth Ratio.** The X-axis plots the log value of the depth for  
160 each genome while the Y-axis plots the cumulative percentage of bases covered to the specified  
161 depth.

162

### 163 Mutation Rate

164           To determine the single nucleotide polymorphisms (SNPs) of SARS-CoV-2 in these 10  
165 patients, we mapped each genome to the original Wuhan-Hu-1 reference which was collected on



166 December 31, 2019 (6). The genomes contained a fairly moderate number of SNPs (mean of 4  
 167 SNPs, range 1-9) (**Table 3**), consistent with previous reports of relatively low mutation rates  
 168 (11). The genomes with the largest number of SNPs came from individuals who had contact with  
 169 a confirmed case from Ningbo, Zhejiang and no travel history to the Hubei province (**Table 3**,  
 170 **Shaoxing-9 and 10**).

171

172 **Table 3. Summary of Genomic Descriptions for the Shaoxing SARS-CoV-2 Genomes**

| ID          | Haplotype | No. of SNP <sup>a</sup> | No. of Days <sup>b</sup> | Mutation Rate (#SNP/day) | Mutation Rate (#SNP/day/nt) | Mutation Rate (#SNP/yr/nt) |
|-------------|-----------|-------------------------|--------------------------|--------------------------|-----------------------------|----------------------------|
| Shaoxing-01 | S         | 2                       | 27                       | 0.07                     | 2.48E-06                    | 9.04E-04                   |
| Shaoxing-02 | S         | 2                       | 30                       | 0.07                     | 2.23E-06                    | 8.14E-04                   |
| Shaoxing-03 | S         | 2                       | 30                       | 0.07                     | 2.23E-06                    | 8.14E-04                   |
| Shaoxing-04 | S         | 2                       | 31                       | 0.06                     | 2.16E-06                    | 7.87E-04                   |
| Shaoxing-05 | L         | 2                       | 31                       | 0.06                     | 2.16E-06                    | 7.87E-04                   |
| Shaoxing-06 | S         | 3                       | 31                       | 0.10                     | 3.24E-06                    | 1.18E-03                   |
| Shaoxing-07 | L         | 5                       | 30                       | 0.17                     | 5.57E-06                    | 2.03E-03                   |
| Shaoxing-08 | L         | 1                       | 38                       | 0.03                     | 8.80E-07                    | 3.21E-04                   |
| Shaoxing-09 | S         | 9                       | 36                       | 0.25                     | 8.36E-06                    | 3.05E-03                   |
| Shaoxing-10 | S         | 9                       | 37                       | 0.24                     | 8.13E-06                    | 2.97E-03                   |
| Min         |           | 1                       | 27                       | 0.03                     | 8.80E-07                    | 3.21E-04                   |
| Max         |           | 9                       | 38                       | 0.25                     | 8.36E-06                    | 3.05E-03                   |
| Mean        |           | 4                       | 32                       | 0.11                     | 3.74E-06                    | 1.37E-03                   |

173 <sup>a</sup> SNP calculated by mapping each genome to the genome of Wuhan-Hu-1 (6)

174 <sup>b</sup> Number of days between the date that the sample was collected and the date the Wuhan-Hu-1 genome was  
 175 published (12/31/2019)

176

177 Using the SNP analysis, we calculated the various mutation rates using the number of  
 178 days between the date that the sample was collected and the date the Wuhan-Hu-1 sample was  
 179 collected. The mutation rate (SNP per day) ranged from 0.03 to 0.25 (**Table 3**). We used this

180 mutation rate to calculate the nucleotide substitution per site per day and the nucleotide  
181 substitution per site per year. We saw an average mutation rate of  $3.74 \times 10^{-6}$  nucleotide  
182 substitution per site per day and an average mutation rate of  $1.37 \times 10^{-3}$  nucleotide substitution per  
183 site per year (**Table 3**).

184 We looked into deeper into each SNP to determine if there were any non-synonymous  
185 mutations in genes important to the virus lifecycle (**Table 4**). No non-synonymous mutations  
186 were found in the S gene, which encodes the spike protein that's critical for viral binding to  
187 human receptor ACE2 (8). Notably in the cluster where the two family members lived together,  
188 the two viruses are closely related but not identical, suggesting a sequential transmission between  
189 them. Shaoxing-9 was infected first and then transmitted to Shaoxing-10, whose virus gained a  
190 non-synonymous mutation (**Table 4**).

191 **Table 4. Summary of SNPs in the Ten SARS-CoV-2 Genomes**

| SNP# | Position | Gene       | Reference nt | Shaoxing-01 | Shaoxing-02 | Shaoxing-03 | Shaoxing-04 | Shaoxing-05 | Shaoxing-06 | Shaoxing-07 | Shaoxing-08 | Shaoxing-09    | Shaoxing-10 |
|------|----------|------------|--------------|-------------|-------------|-------------|-------------|-------------|-------------|-------------|-------------|----------------|-------------|
| 1    | 207      | non-coding | C            |             |             |             |             |             |             |             |             | T (non-coding) |             |
| 2    | 889      | orf1ab     | T            |             |             |             |             |             |             | C (A)       |             |                |             |
| 3    | 946      | orf1ab     | T            |             |             |             |             |             |             |             |             | C (G)          | C (G)       |
| 4    | 5099     | orf1ab     | T            |             |             |             |             |             |             |             |             | A (S->T)       | A (S->T)    |
| 5    | 7420     | orf1ab     | C            |             |             |             |             |             |             |             |             | T (I)          | T (I)       |
| 6    | 8344     | orf1ab     | C            |             |             |             |             |             |             |             | T (D)       |                |             |
| 7    | 8782     | orf1ab     | C            | T (S)       | T (S)       | T (S)       | T (S)       |             | T (S)       |             |             | T (S)          | T (S)       |
| 8    | 9962     | orf1ab     | C            |             |             |             |             |             |             |             |             |                | T (H->Y)    |
| 9    | 11430    | orf1ab     | A            |             |             |             |             |             |             |             |             | G (Y->C)       | G (Y->C)    |
| 10   | 11916    | orf1ab     | C            |             |             |             |             |             |             | T (S->L)    |             |                |             |
| 11   | 15324    | orf1ab     | C            |             |             |             |             | T (N)       |             |             |             |                |             |
| 12   | 21676    | S          | C            |             |             |             |             |             |             |             |             | T (Y)          | T (Y)       |
| 13   | 22081    | S          | G            |             |             |             |             |             |             | A (Q)       |             |                |             |
| 14   | 25672    | ORF3a      | C            |             |             |             |             |             |             | A (L->I)    |             |                |             |
| 15   | 28000    | ORF8       | C            |             |             |             |             |             |             | T (P->L)    |             |                |             |
| 16   | 28144    | ORF8       | T            | C (L->S)    | C (L->S)    | C (L->S)    | C (L->S)    |             | C (L->S)    |             |             | C (L->S)       | C (L->S)    |
| 17   | 29095    | N          | C            |             |             |             |             |             | T (F)       |             |             |                |             |
| 18   | 29303    | N          | C            |             |             |             |             | T (P->S)    |             |             |             |                |             |
| 19   | 29625    | ORF10      | C            |             |             |             |             |             |             |             |             | T (S->F)       | T (S->F)    |

L Type

S Type

Non- Synonymous

Synonymous

192 SNP analysis was based on NC\_045512.2 (Wuhan-Hu-1) as the reference genome (6). Variants are denoted as nucleotides versus the reference base. Amino acid  
 193 changes listed in parentheses with synonymous mutations listed as a single residue. The non-synonymous mutations are bolded.  
 194

195 SARS-CoV-2 Genotype and Phylogenetic Characteristics

196 Previous reports demonstrate that SARS-CoV-2 has two genotypes known as L type and  
197 S type (10). The majority of the Shaoxing patients in this study have the S type (70%). We  
198 decided to compare our ten SARS-CoV-2 genomes to 163 other published SARS-CoV-2  
199 genomes obtained from GISAID (9). The majority of the SARS-CoV-2 genomes obtained from  
200 GISAID are the L type (**Fig 2, red**). The Shaoxing SARS-CoV-2 genomes are distributed  
201 throughout the other genomes (**Fig 2, green dots**).

202

203 **Fig 2 Phylogenetic Comparison of SARS-CoV-2 Genomes.**

204 Phylogenetic comparison of 162 published genomes from GISAID (9) and the ten Shaoxing  
205 genomes (green dots). Genomes are color-coded based on their haplotype (Red=L type, Blue=S  
206 type).

207

208 Interestingly, four of the Shaoxing SARS-CoV-2 genomes were identical to six other  
209 GISAID SARS-CoV-2 genomes (**Fig 2, Cluster 1**). These six other genomes were isolated from  
210 patients all over the world: two from Wuhan, two from Taiwan, one from Belgium and one from  
211 Australia (**Fig 2, Cluster 1**). The cluster with family members who lived together (Shaoxing-9 &  
212 -10) is closely related to another cluster found in England (**Fig 2, Cluster 2**). Shaoxing-6 is  
213 identical to five other genomes isolated in Shenzhen, Guangdong Province, China (**Fig 2,**  
214 **Cluster 3**).

215 The three Shaoxing L type genomes are phylogenetically distributed throughout the other  
216 L type genomes (**Fig 2**). Shaoxing-5 is closed related to two other genomes from China (**Fig 2,**  
217 Guangzhou\_20SF206\_2020 and China\_IQTC01\_2020), while Shaoxing-7 is closed related to a

218 genome isolated from Singapore (**Fig 2**, Singapore\_1\_2020). Shaoxing-8 is not closely related to  
219 any other L type genome (**Fig 2**).

220

## 221 DISCUSSION

222 In this study, we sequenced the SARS-CoV-2 genome from ten patient samples from  
223 Shaoxing, Zhejiang, China. Using metagenomic sequencing, we were able to obtain above 99%  
224 coverage and an average depth of 296X for all 10 SARS-CoV-2 genomes. Although not  
225 statistically significant, there does appear to be a clear negative correlation between the  $C_t$  values  
226 of both gene targets and the log count of SARS-CoV-2 RNA sequence reads acquired by  
227 metagenomics sequencing. This suggests that the log value of RNA sequence reads by  
228 metagenomics sequencing may be used as a semi-quantitative, but not accurate, measurement for  
229 SARS-CoV-2 viral loads.

230 The rapid spread of this virus is highlighted by the fact that four SARS-CoV-2 genomes  
231 from Shaoxing individuals were identical to six other SARS-CoV-2 genomes from patients all  
232 over the world. We were unable to obtain epidemiologic data from the other six SARS-CoV-2  
233 genomes but it would be interesting to see if these patients shared the same contact or not.

234 Overall, we did not see a large number of SNPs in these SARS-CoV-2 genomes. The  
235 greatest number of SNPs seen was 9 and these two SARS-CoV-2 genomes were from individuals  
236 with no travel history to Hubei province (**Table 3, Shaoxing-9 and 10**). Instead, Shaoxing-9 and  
237 10 had contact with a confirmed case from Ningbo, another city outside of Hubei. We can use  
238 these data to infer that the virus accumulated more mutations when it was spread to another city  
239 outside of Hubei first before coming to Shaoxing, compared to the virus spread to Shaoxing  
240 directly from Hubei.

241 We combined epidemiologic data with the SNP analysis to estimate the mutation rate of  
242 the SARS-CoV-2 from these ten patients. We saw an average mutation rate of  $1.37 \times 10^{-3}$   
243 nucleotide substitution per site per year for SARS-CoV-2, which is similar to SARS-CoV-1 with  
244 a reported mutation rate of  $0.80\text{-}2.38 \times 10^{-3}$  nucleotide substitution per site per year (12). These  
245 data demonstrate that SARS-CoV-2 is similar in the mutation rate as other coronaviruses.

246 Our data support the hypothesis put forward by Tang et al. 2020, which states that human  
247 intervention efforts in China may have put selective pressure on both the S and L genotypes of  
248 SARS-CoV-2 (10). The less aggressive form of the SARS-CoV-2 (S type) was allowed to  
249 increase in prevalence due to relatively weaker selective pressure. Although a small sample size,  
250 70% (7/10) of our patients were infected with the S type and the majority of which (71%, 5/7)  
251 traveled to or from Wuhan within 14 days of symptom onset. The dynamics of S and L genotype  
252 distribution may have a role in assessment of the severity of the outbreak as it is still rampaging  
253 the world as we write this manuscript. Our study adds the growing body of evidence that the  
254 mutation rate of SARS-CoV-2 is not any different from other coronavirus, which is important for  
255 vaccine development (11, 13).

256 The major limitation of this study is that we only had 10 samples analyzed due to the  
257 requirement of sufficient SARS-CoV-2 RNA from a metagenomic sample. However, with the  
258 development of a SARS-CoV-2 probe enrichment kit, this type of deep sequencing analysis may  
259 be applied to samples with lower viral loads, thereby enabling more complete molecular  
260 epidemiological surveillance. In addition, the  $C_t$  value cut-off of 28 established in this study may  
261 not be directly applicable to other real-time PCR assays due to the technical differences.

262 In summary, we showed that a full viral genomic analysis is feasible via metagenomics  
263 sequencing on nasopharyngeal samples with SARS-CoV-2 Real-time PCR  $C_t$  values less than 28.

264 Our analysis demonstrated that the virus spread extremely quickly around the globe as early as  
265 late January with few mutations. The mutation rate of the virus is similar to that of other  
266 coronaviruses, lending hope that development of an effective, long-lasting vaccine may be  
267 possible.

268

## 269 ACKNOWLEDGEMENTS

270 We would like to thank Yong-Zhen Zhang (Fudan University) and Eddie Holmes  
271 (University of Sydney) for sharing the sequence of the first SARS-CoV-2 isolate in a very timely  
272 manner. We would also like to thank Fanchao Meng, Bin Hu, Haihao Shou and Yuanyuan Cai  
273 from Shaoxing IngeniGen XMK Biotechnologies, Inc. for their technical assistance. This study  
274 is funded by Shaoxing IngeniGen XMK Biotechnologies, Inc.

275

## 276 References

277

- 278 1. Cascella M, Rajnik M, Cuomo A, Dulebohn SC, Di Napoli R. Features, Evaluation and  
279 Treatment Coronavirus (COVID-19). StatPearls. Treasure Island (FL): StatPearls Publishing  
280 StatPearls Publishing LLC.; 2020.
- 281 2. Weiss SR, Leibowitz JL. Coronavirus pathogenesis. *Adv Virus Res.* 2011;81:85-164.
- 282 3. Corman VM, Muth D, Niemeyer D, Drosten C. Hosts and Sources of Endemic Human  
283 Coronaviruses. *Adv Virus Res.* 2018;100:163-88.
- 284 4. Rota PA, Oberste MS, Monroe SS, Nix WA, Campagnoli R, Icenogle JP, et al.  
285 Characterization of a novel coronavirus associated with severe acute respiratory syndrome.  
286 *Science.* 2003;300(5624):1394-9.

- 287 5. Zaki AM, van Boheemen S, Bestebroer TM, Osterhaus AD, Fouchier RA. Isolation of a  
288 novel coronavirus from a man with pneumonia in Saudi Arabia. *The New England journal of*  
289 *medicine*. 2012;367(19):1814-20.
- 290 6. Wu F, Zhao S, Yu B, Chen YM, Wang W, Song ZG, et al. A new coronavirus associated  
291 with human respiratory disease in China. *Nature*. 2020;579(7798):265-9.
- 292 7. Wang C, Horby PW, Hayden FG, Gao GF. A novel coronavirus outbreak of global health  
293 concern. *Lancet (London, England)*. 2020;395(10223):470-3.
- 294 8. Zhou P, Yang XL, Wang XG, Hu B, Zhang L, Zhang W, et al. A pneumonia outbreak  
295 associated with a new coronavirus of probable bat origin. *Nature*. 2020;579(7798):270-3.
- 296 9. Shu Y, McCauley J. GISAID: Global initiative on sharing all influenza data - from vision  
297 to reality. *Euro Surveill*. 2017;22(13).
- 298 10. Tang X, Wu C, Li X, Song Y, Yao X, Wu X, et al. On the origin and continuing  
299 evolution of SARS-CoV-2. *National Science Review*. 2020.
- 300 11. Wang C, Liu Z, Chen Z, Huang X, Xu M, He T, et al. The establishment of reference  
301 sequence for SARS-CoV-2 and variation analysis. *J Med Virol*. 2020.
- 302 12. Zhao Z, Li H, Wu X, Zhong Y, Zhang K, Zhang YP, et al. Moderate mutation rate in the  
303 SARS coronavirus genome and its implications. *BMC Evol Biol*. 2004;4:21.
- 304 13. Li X, Wang W, Zhao X, Zai J, Zhao Q, Li Y, et al. Transmission dynamics and  
305 evolutionary history of 2019-nCoV. *J Med Virol*. 2020;92(5):501-11.

306



307 SUPPLEMENTARY INFORMATION CAPTIONS

308 **S1 Fig Correlation of  $C_t$  Values and SARS-CoV-2 RNA Reads.**

309 **(A) *ORF1ab* Correlation.** The X-axis plots the log value of the SARS-CoV-2 RNA reads while  
310 the Y-axis plots the  $C_t$  values for the *ORF1ab* gene for the ten Shaoxing patients. **(B) *N***  
311 **Correlation.** The X-axis plots the log value of the SARS-CoV-2 RNA reads while the Y-axis  
312 plots the  $C_t$  values for the *N* gene for the ten Shaoxing patients.

313

**A.**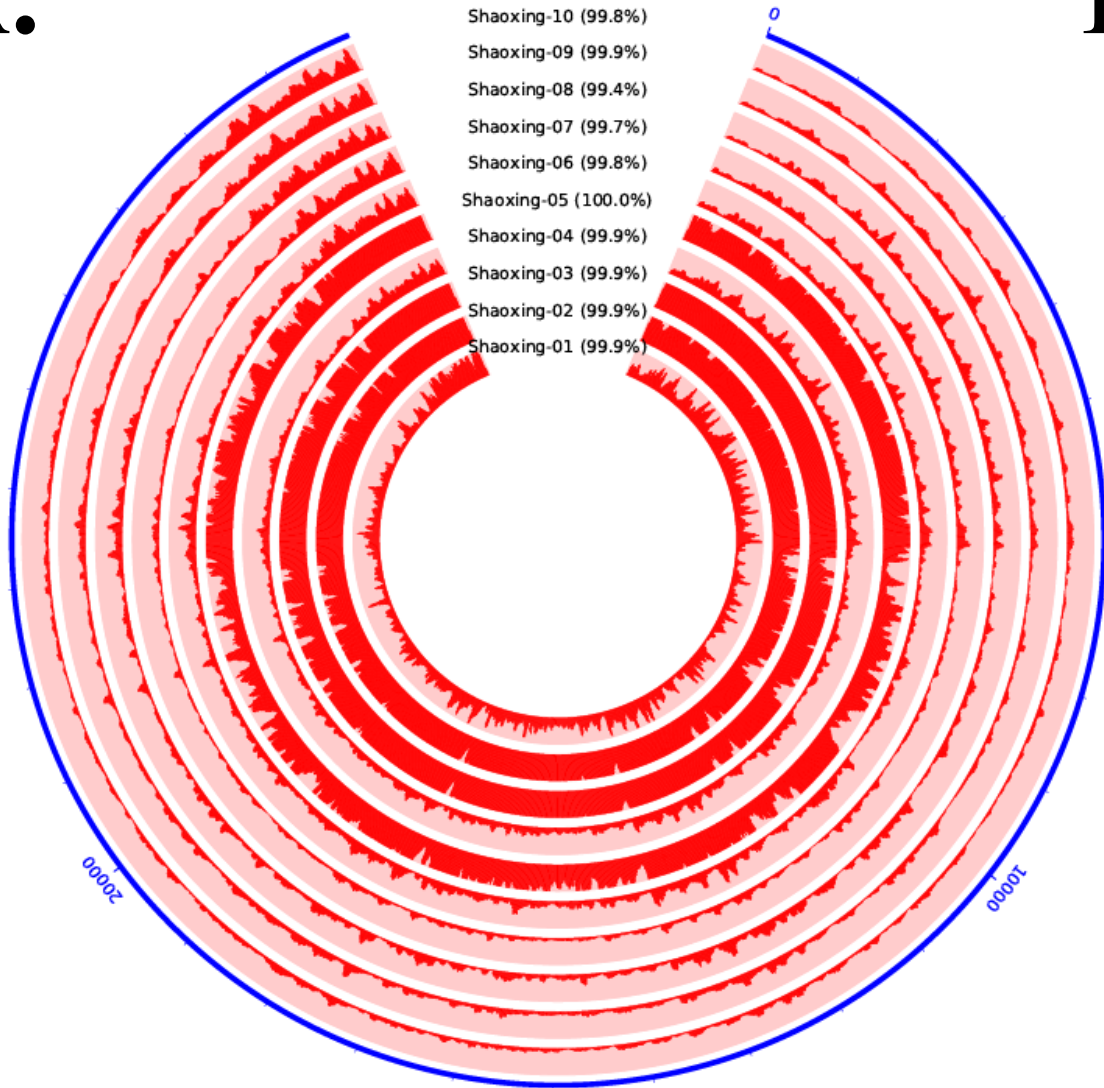**B.**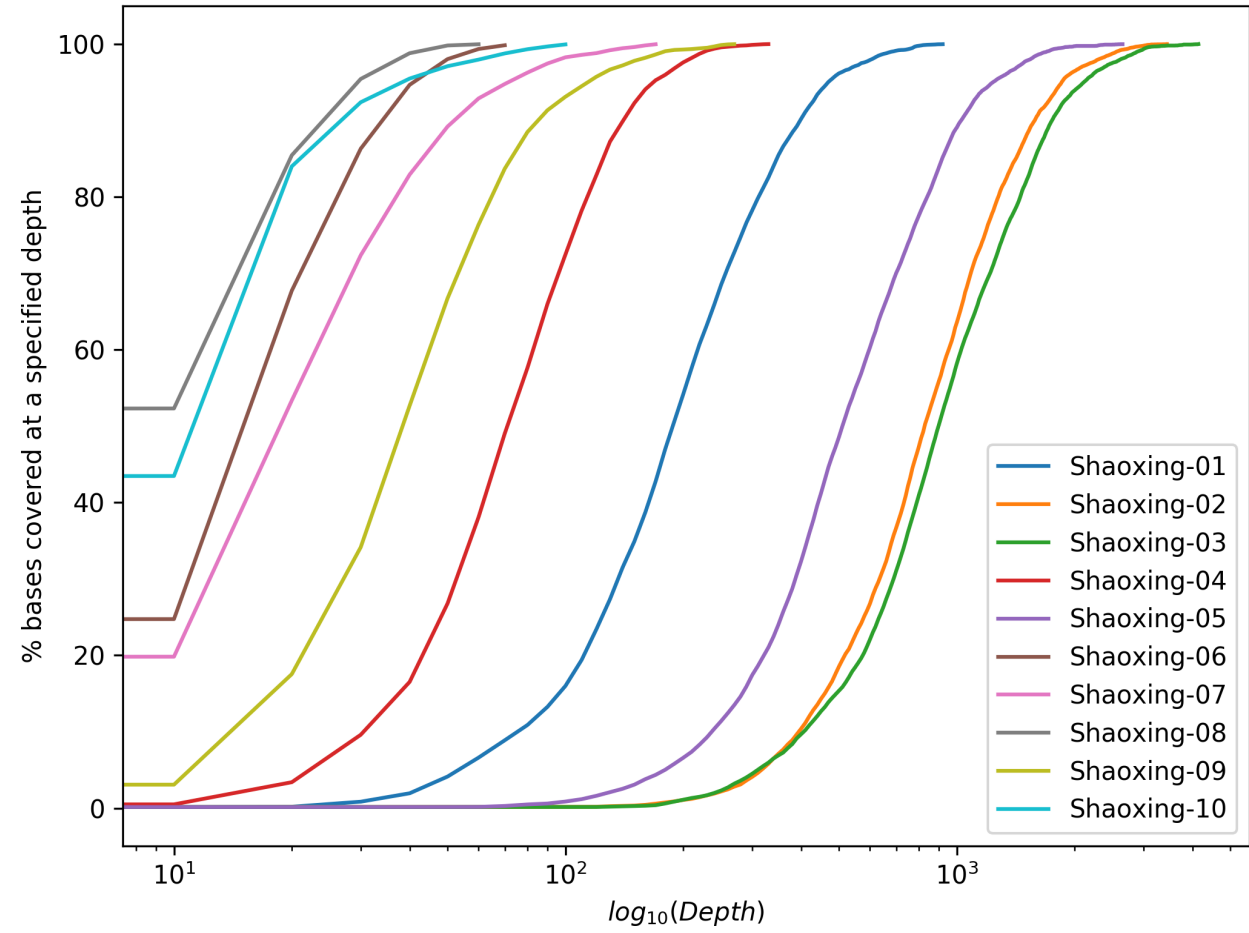

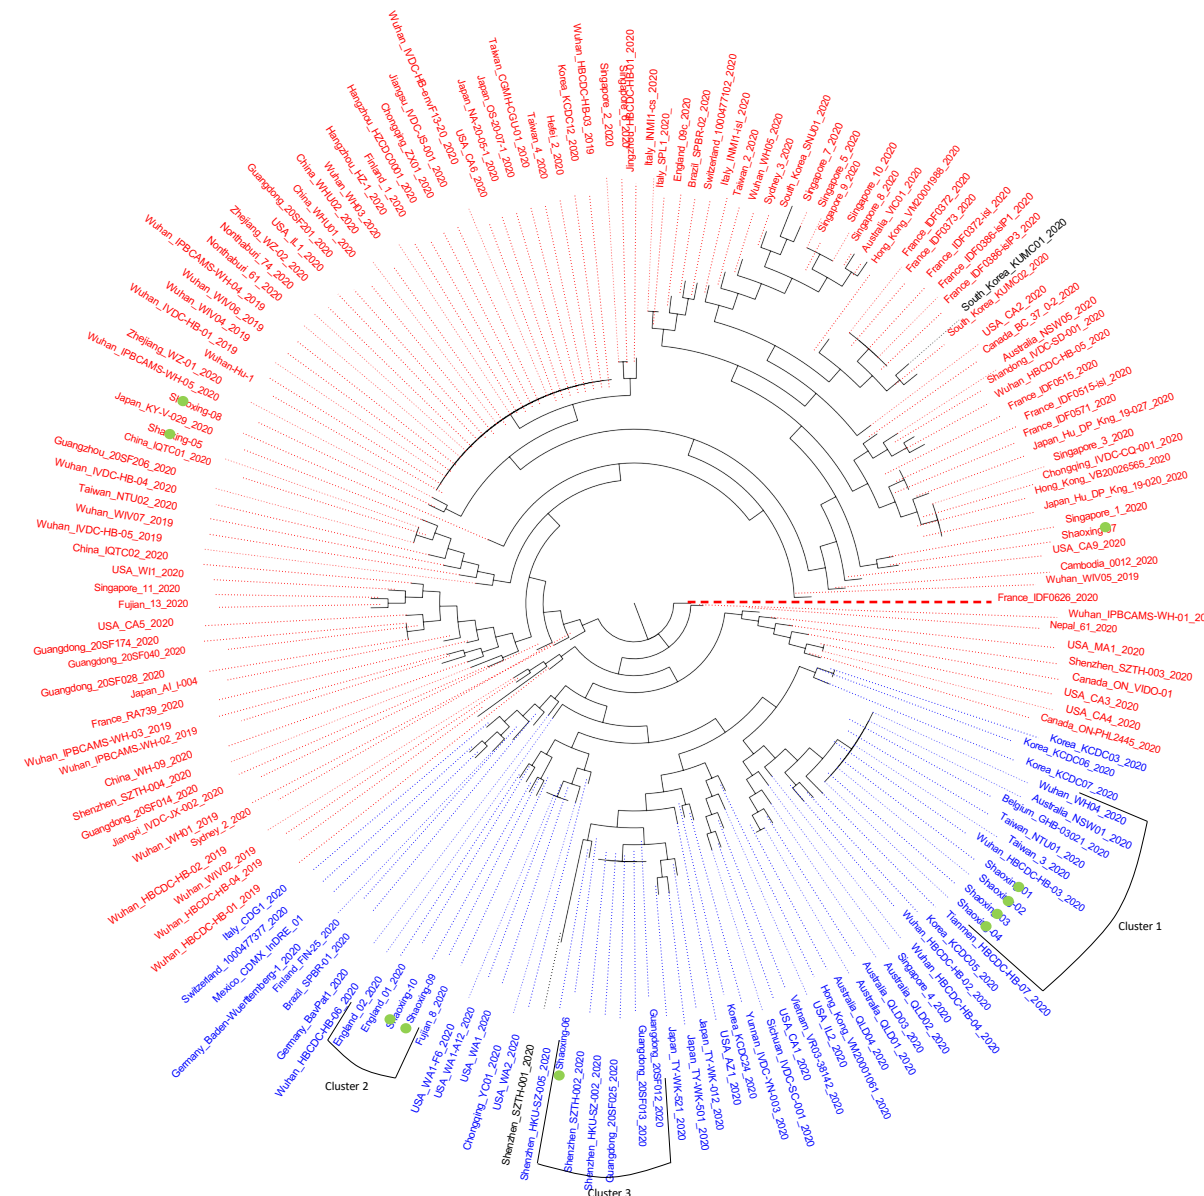

- S Type
- L Type
- Opposite Type
- Shaoxing Genome
